# Supplementary material for: Depletion layer controls photocatalytic hydrogen evolution with p-type gallium phosphide particles
Source: Royal Society of Chemistry journal article supplement (doi:10.1039/c9ta05879f), 2019-01-01
Supplement: c9ta05879f1.pdf [file c9ta05879f1.pdf]

Supporting Information (3 pages)

# Depletion layer controls photocatalytic hydrogen evolution with p-type gallium phosphide particles

Zeqiong Zhao,<sup>†</sup> Emma J. Willard,<sup>†</sup> Julius R. Dominguez,<sup>†</sup> Zongkai Wu,<sup>†</sup> Frank E. Osterloh<sup>\*,†</sup>

<sup>†</sup>Department of Chemistry, University of California Davis, One Shields Avenue, Davis, California 95616, United States

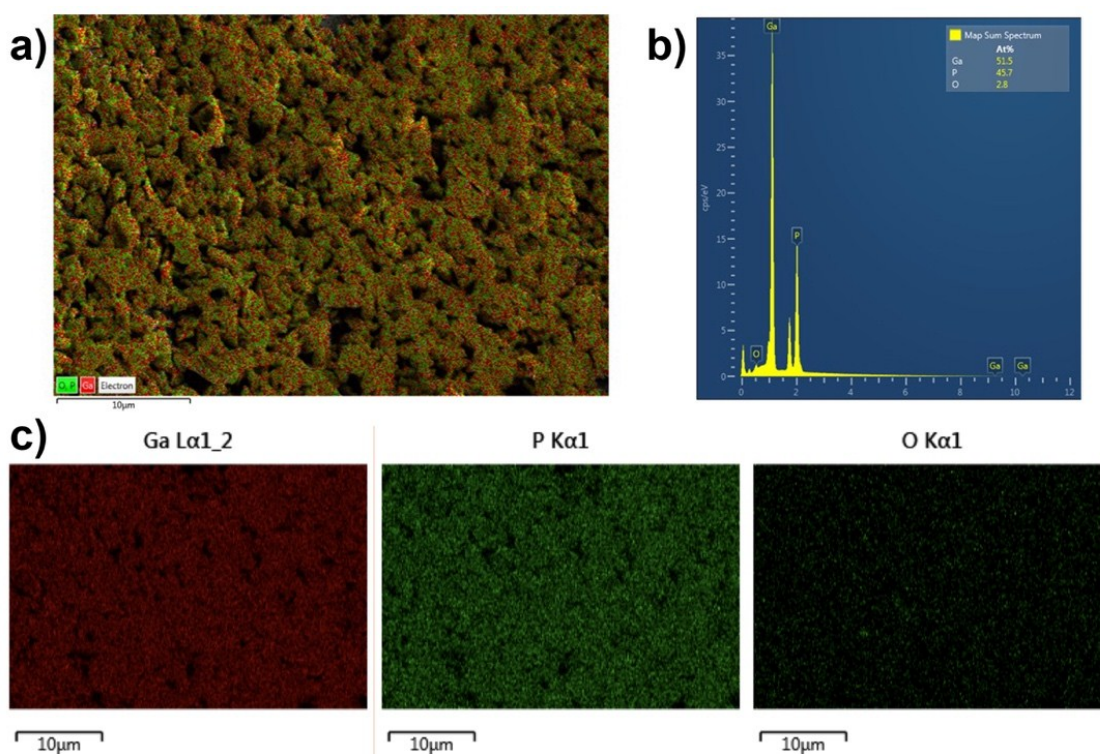

**Figure S1** (a) EDX mapping layered SEM image, (b) EDX spectrum and (c) EDX mapping of individual elements of obtained p-GaP particles.

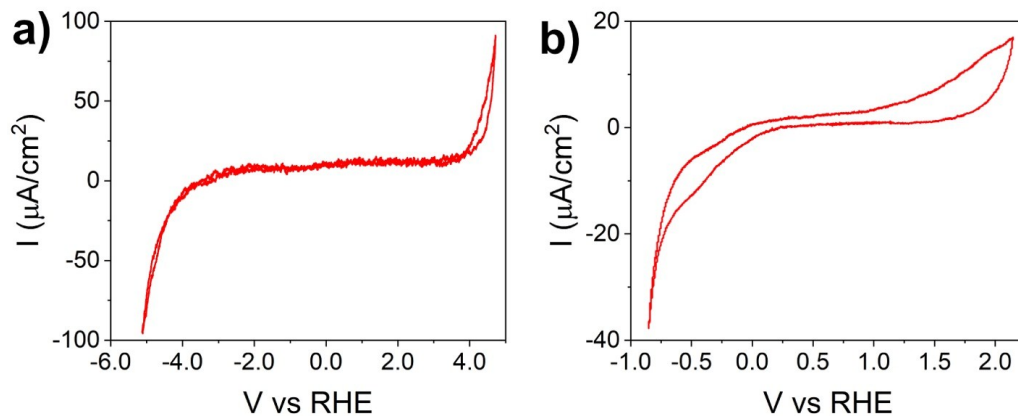

**Figure S2** Cyclic voltammetry measurement of (a) p-GaP wafer and (b) p-GaP particle film in 0.1 M  $K_2SO_4$ .

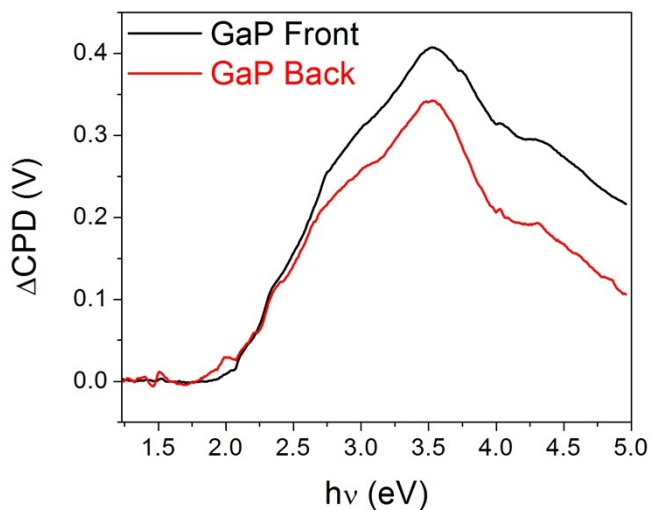

**Figure S3** SPS spectra of p-GaP wafer with front side or back side illuminated.

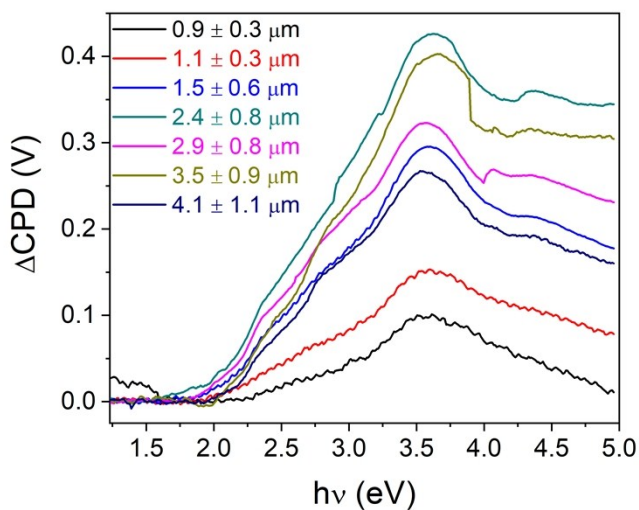

**Figure S4** SPS spectra of p-GaP particle films with different film thickness.

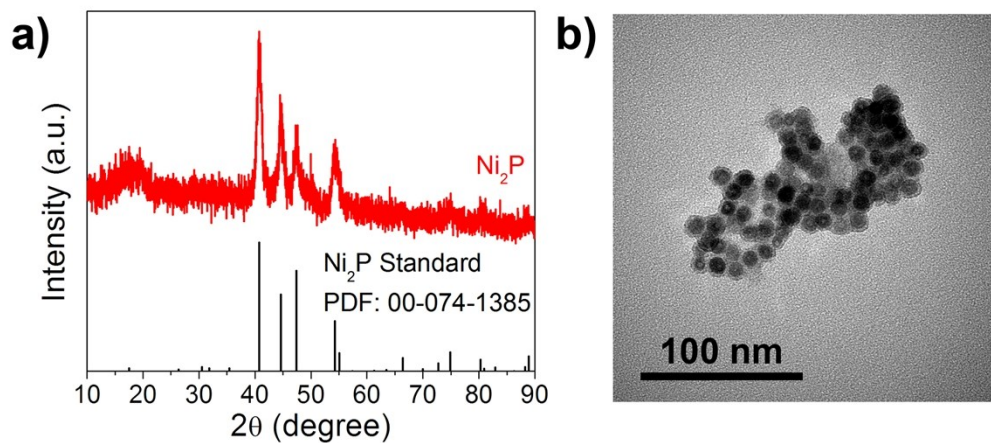

**Figure S5** (a) PXRD pattern and (b) TEM image of  $\text{Ni}_2\text{P}$  capped with PVP.

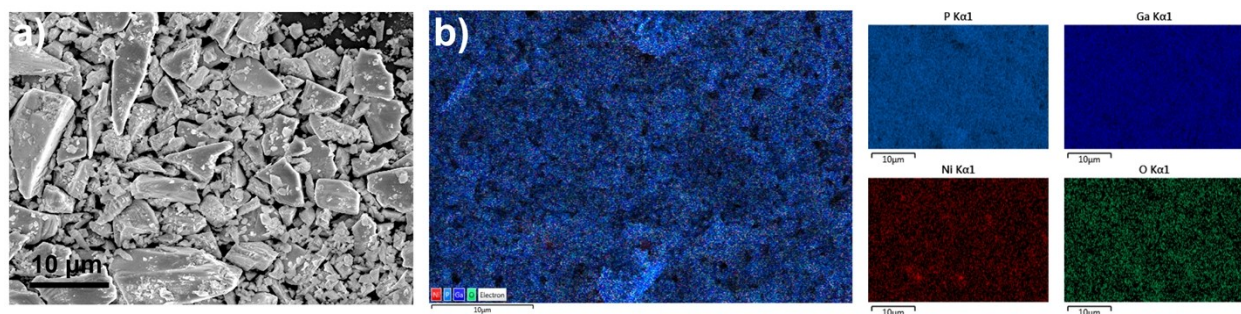

**Figure S6** (a) SEM and (b) EDX mapping of individual elements in optimized 4 wt%  $\text{Ni}_2\text{P}$  /p-GaP photocatalyst particles. According to energy dispersive X-ray analysis, the  $\text{Ni}_2\text{P}$  loading is 4.3 %.
